# Supplementary figures and images for: MRGPRX4 is a bile acid receptor for human cholestatic itch
Source: eLife journal article supplement (doi:10.7554/elife.48431), 2019-09-09

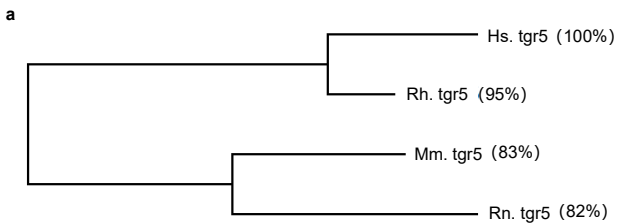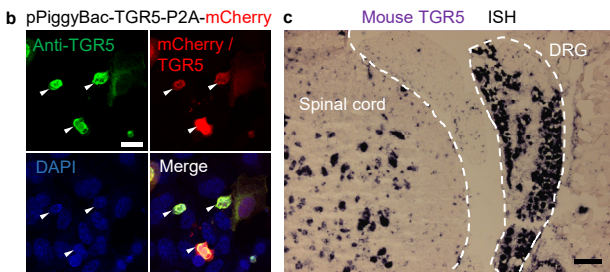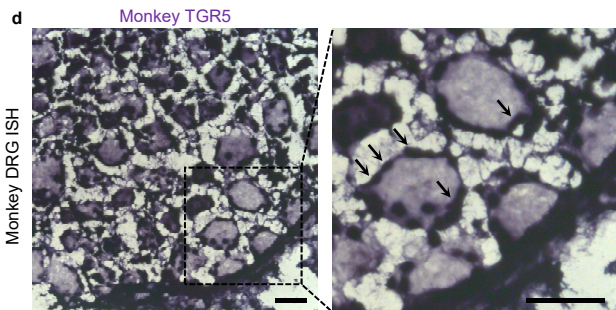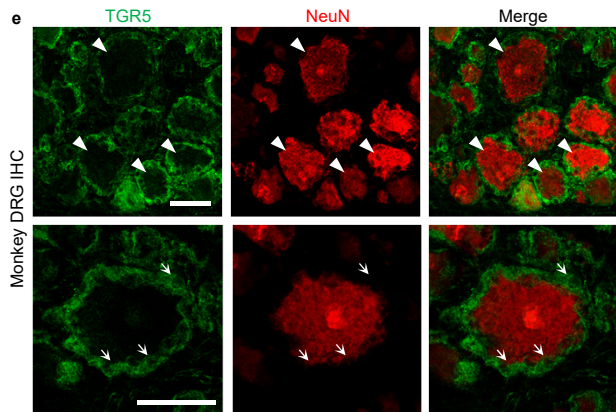

Supplement: supp [file elife-48431-supp-v1.zip]

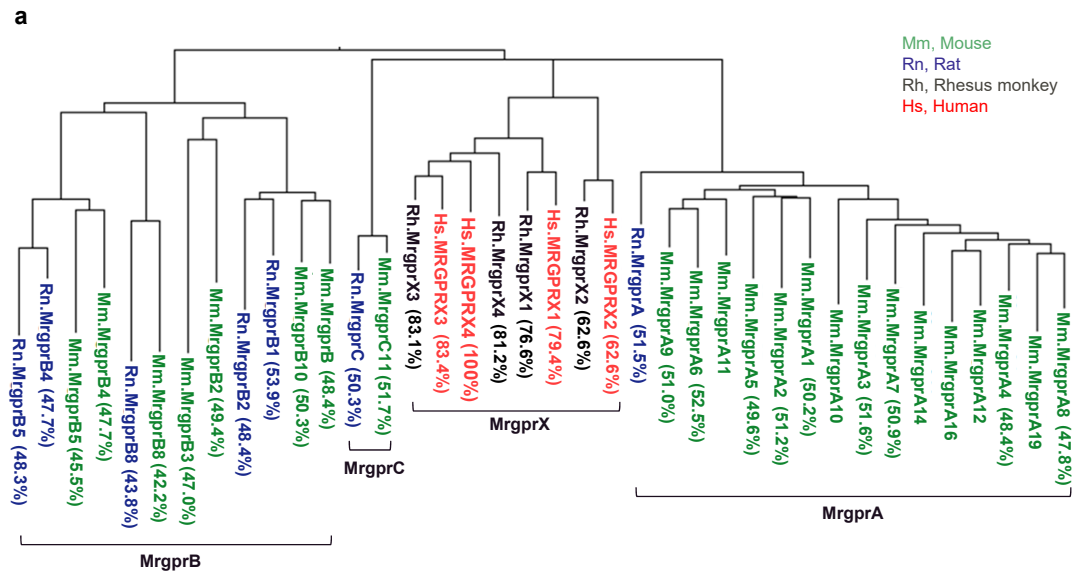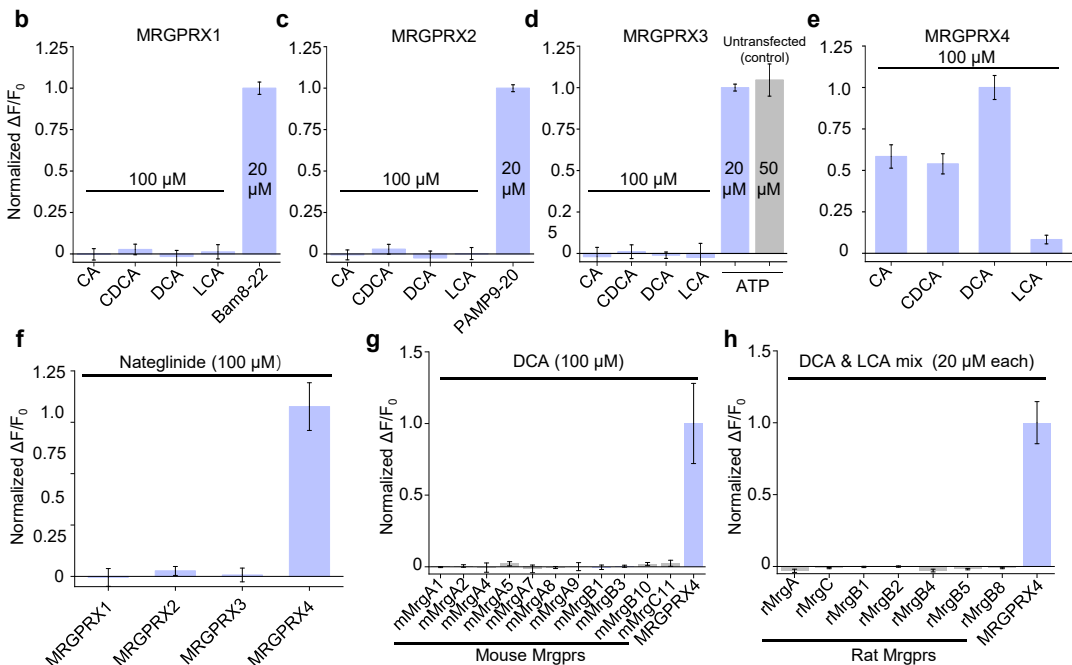

Supplement: supp [file elife-48431-supp-v1.zip]

**a**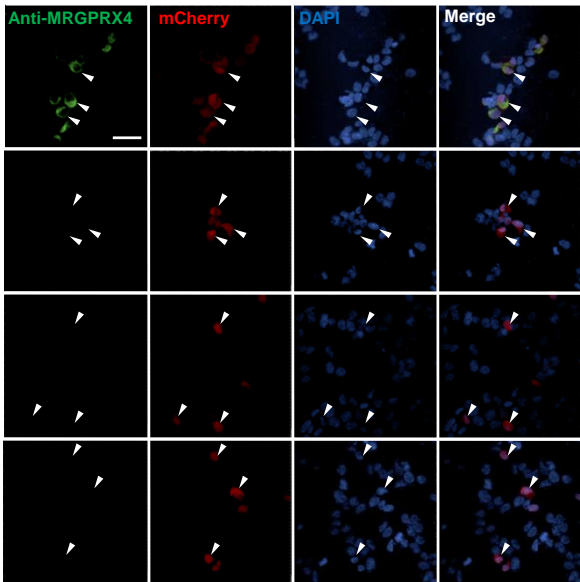

Supplement: supp [file elife-48431-supp-v1.zip]

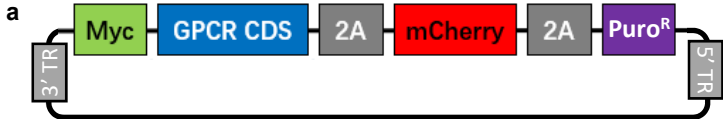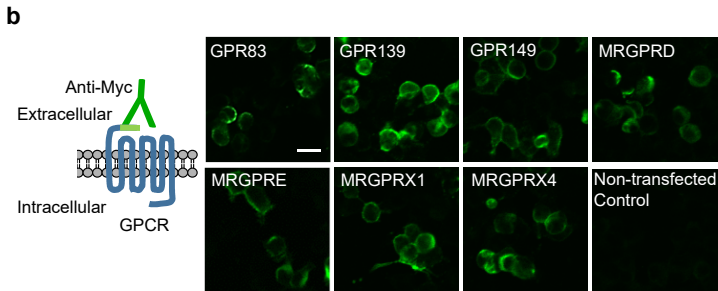

Supplement: supp [file elife-48431-supp-v1.zip]

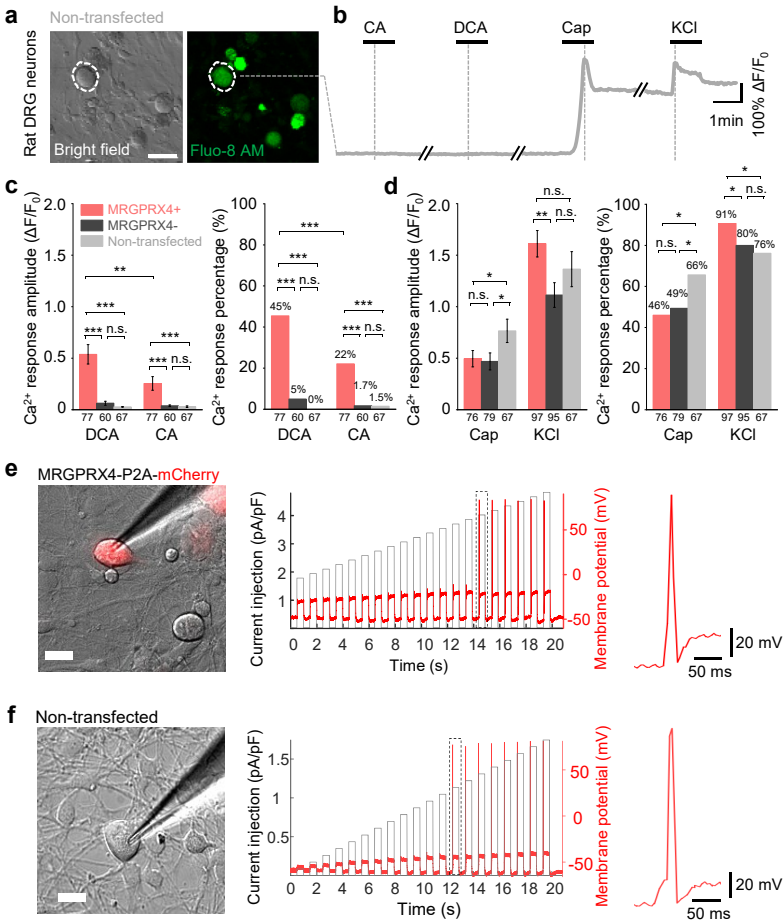

Supplement: supp [file elife-48431-supp-v1.zip]

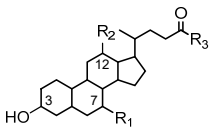

The hydrogen chemical shift at the carbon 3, 7, 12

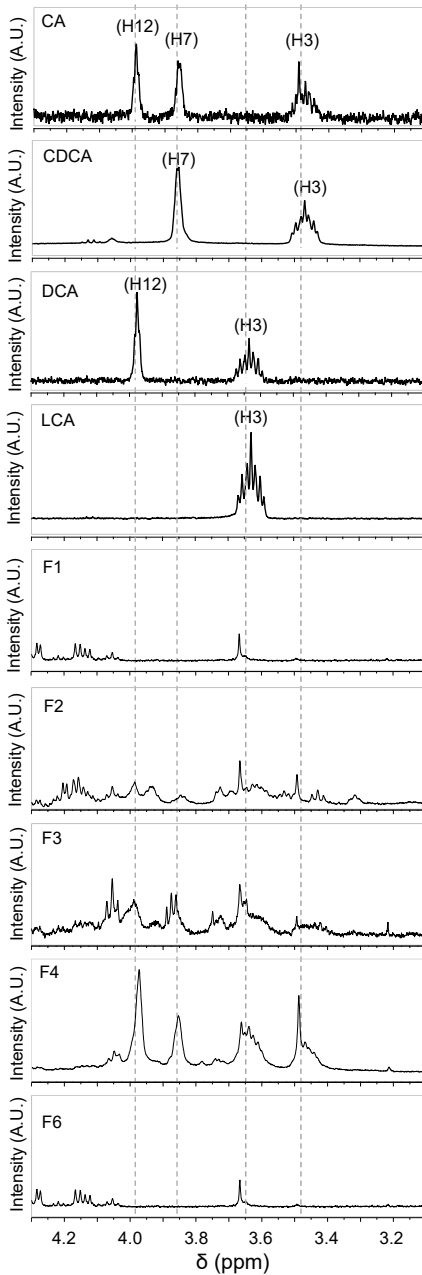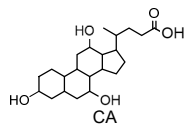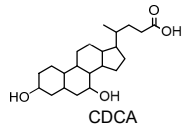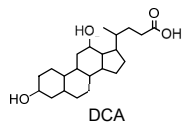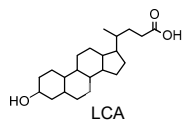

Supplement: supp [file elife-48431-supp-v1.zip]

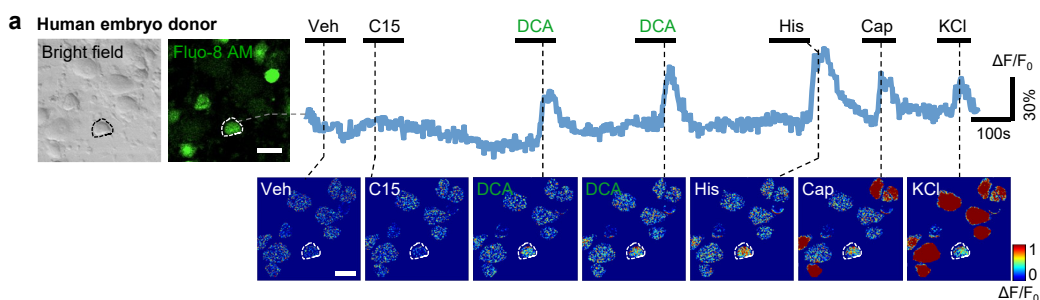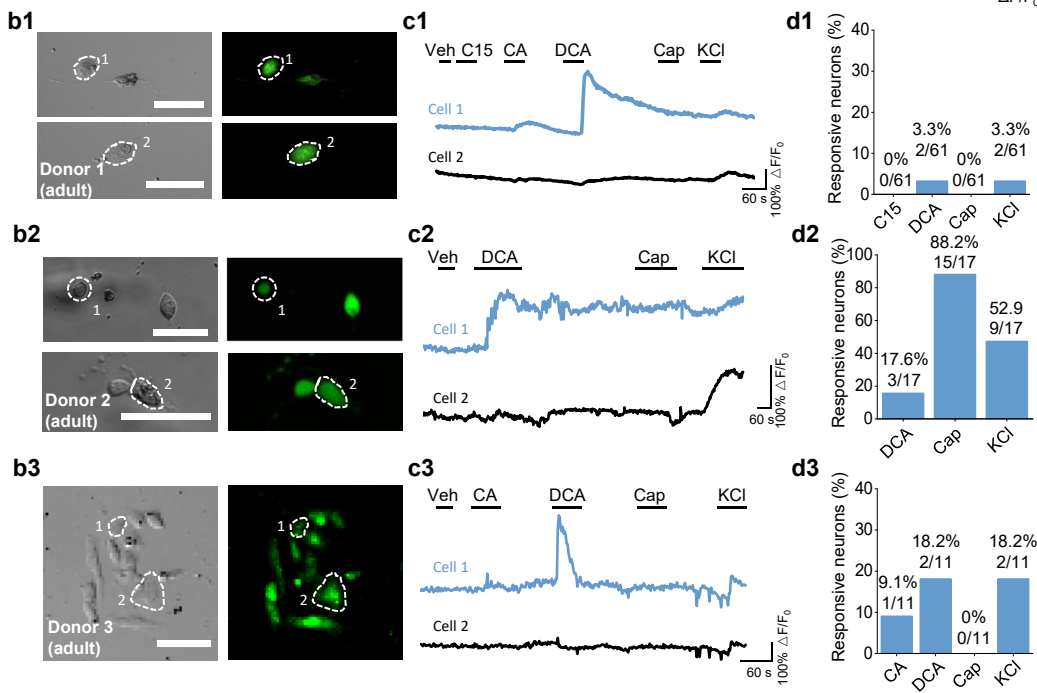

Supplement: supp [file elife-48431-supp-v1.zip]

**a**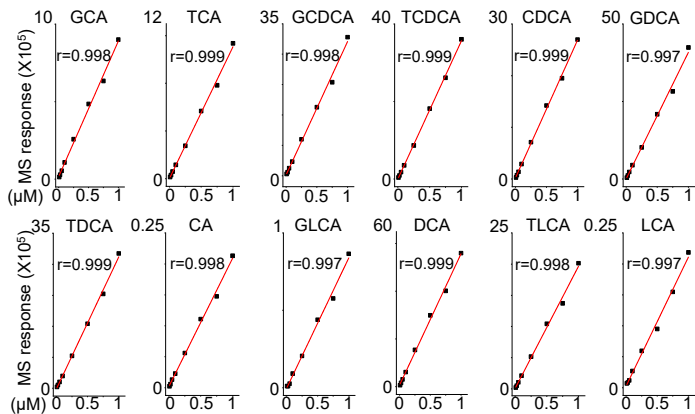**b**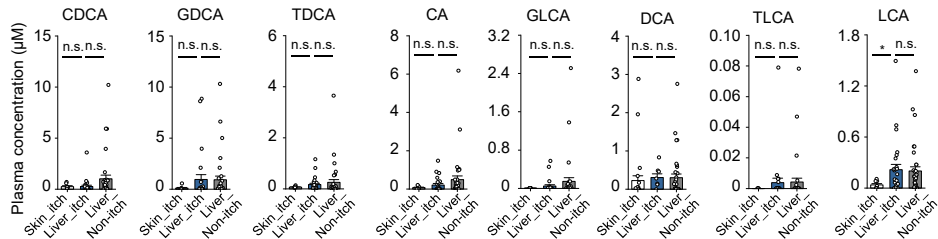**c**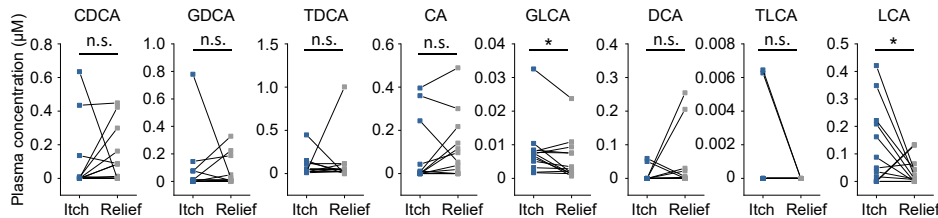

Supplement: supp [file elife-48431-supp-v1.zip]
